# Supplementary material for: Comparative Leaf and Root Transcriptomic Analysis of two Rice Japonica Cultivars Reveals Major Differences in the Root Early Response to Osmotic Stress
Source: PubMed Central journal article supplement (PMC4877341; doi:10.1186/s12284-016-0098-1), 2016-05-23
Supplement: 12284_2016_98_MOESM1_ESM.pdf [file 12284_2016_98_MOESM1_ESM.pdf]

| Sample            | Passed-filter reads | Contaminant free reads | Total alignments | Mapped reads |
|-------------------|---------------------|------------------------|------------------|--------------|
| Eurosis_03hCtr_F1 | 20763821            | 25234717               | 19868835         | 18407981     |
| Eurosis_03hCtr_F2 | 33696924            | 40967857               | 32355639         | 29984211     |
| Eurosis_03hCtr_F3 | 17336584            | 19567452               | 16622965         | 15605804     |
| Eurosis_03hPEG_F1 | 20575142            | 24367507               | 19778642         | 18510957     |
| Eurosis_03hPEG_F2 | 25084404            | 28920392               | 24164646         | 22759615     |
| Eurosis_03hPEG_F3 | 24245826            | 28927119               | 23274367         | 21746953     |
| Eurosis_24hCtr_F1 | 20340311            | 24437597               | 19659712         | 18318909     |
| Eurosis_24hCtr_F2 | 21580630            | 24940146               | 20792859         | 19464850     |
| Eurosis_24hCtr_F3 | 21457278            | 24730114               | 20726381         | 19448144     |
| Eurosis_24hPEG_F1 | 36114436            | 42735816               | 34773252         | 32639947     |
| Eurosis_24hPEG_F2 | 26526461            | 31647671               | 25609379         | 23990573     |
| Eurosis_24hPEG_F3 | 17771368            | 20498371               | 17146859         | 16123550     |
| Loto_03Ctrh_F1    | 22513154            | 26334284               | 21676502         | 20230164     |
| Loto_03hCtr_F2    | 17469767            | 20250537               | 16702498         | 15617116     |
| Loto_03hCtr_F3    | 23188727            | 27276565               | 22350263         | 20866913     |
| Loto_03hPEG_F1    | 19610173            | 23247896               | 18953072         | 17820257     |
| Loto_03hPEG_F2    | 25145457            | 29562909               | 24298692         | 22862300     |
| Loto_03hPEG_F3    | 26069816            | 30244388               | 25246214         | 23837596     |
| Loto_24hCtr_F1    | 18563576            | 22224464               | 17912315         | 16682415     |
| Loto_24hCtr_F2    | 19896471            | 39029811               | 19190811         | 15927590     |
| Loto_24hCtr_F3    | 19927222            | 23214130               | 19220825         | 17970281     |
| Loto_24hPEG_F1    | 21819692            | 27219816               | 21046260         | 19626021     |
| Loto_24hPEG_F2    | 22269678            | 26682297               | 21402400         | 20072098     |
| Loto_24hPEG_F3    | 20604354            | 23844088               | 19775643         | 18615088     |
| Eurosis_03hCtr_R1 | 20325938            | 22312285               | 18319464         | 16886959     |
| Eurosis_03hCtr_R2 | 22181460            | 24688856               | 20268811         | 18666216     |
| Eurosis_03hCtr_R3 | 33005934            | 35502802               | 30359756         | 28293045     |
| Eurosis_03hPEG_R1 | 20640204            | 25866226               | 19459001         | 17398479     |
| Eurosis_03hPEG_R2 | 22318856            | 25139003               | 20957762         | 19386020     |
| Eurosis_03hPEG_R3 | 23964887            | 27674847               | 22740717         | 20934616     |
| Eurosis_24hCtr_R1 | 25440063            | 27855286               | 23412699         | 21685208     |
| Eurosis_24hCtr_R2 | 22821078            | 26520109               | 21298787         | 19461780     |
| Eurosis_24hCtr_R3 | 30254897            | 32939393               | 28219288         | 26303241     |
| Eurosis_24hPEG_R1 | 18804012            | 22297246               | 17434256         | 15820196     |
| Eurosis_24hPEG_R2 | 21141453            | 23032199               | 19487417         | 18129823     |
| Eurosis_24hPEG_R3 | 26559336            | 29058935               | 24615964         | 22884185     |
| Loto_03hCtr_R1    | 32209705            | 37293510               | 30080240         | 27477074     |
| Loto_03hCtr_R2    | 18625924            | 22999916               | 17519550         | 15725161     |
| Loto_03hCtr_R3    | 34105327            | 43342752               | 32337433         | 28806745     |
| Loto_03hPEG_R1    | 19153517            | 24442526               | 18349090         | 16406426     |
| Loto_03hPEG_R2    | 23489512            | 26431380               | 21797838         | 20142504     |
| Loto_03hPEG_R3    | 34038313            | 40669536               | 32012587         | 29179137     |
| Loto_24hCtr_R1    | 21210047            | 25746111               | 18815511         | 16659239     |
| Loto_24hCtr_R2    | 30157353            | 33251537               | 27638315         | 25451379     |
| Loto_24hCtr_R3    | 30102568            | 31783085               | 26854970         | 24910883     |
| Loto_24hPEG_R1    | 24513878            | 28591922               | 22727767         | 20749459     |
| Loto_24hPEG_R2    | 23745922            | 30551365               | 22128820         | 19544509     |
| Loto_24hPEG_R3    | 22398037            | 27654372               | 20435968         | 18225754     |
